# Supplementary material
Source: PubMed Central journal article supplement (PMC5865072)
Supplement: NIHMS950324-supplement-S.pdf [file NIHMS950324-supplement-S.pdf]

**Supplemental Table 1. Baseline Characteristics at Re-LT by Graft Failure Etiology in Patients with PSC.**

|                                 | <b>VT</b><br><b>(n=194)</b> | <b>REC</b><br><b>(n=178)</b> | <b>PNF</b><br><b>(n=128)</b> | <b>BC</b><br><b>(n=121)</b> | <b>CR</b><br><b>(n=83)</b> | <b>AR</b><br><b>(n=48)</b> | <b>Other</b><br><b>(n=46)</b> | <b>INF</b><br><b>(n=42)</b> | <b>Unknown</b><br><b>(n=63)</b> |
|---------------------------------|-----------------------------|------------------------------|------------------------------|-----------------------------|----------------------------|----------------------------|-------------------------------|-----------------------------|---------------------------------|
| <b>Days between transplants</b> | 59<br>(14-336)              | 2,519<br>(1,523-3,513)       | 28<br>(6-482)                | 504<br>(101-1,713)          | 1,670<br>(424-2,636)       | 54<br>(20-302)             | 48<br>(16-369)                | 208<br>(50-1,088)           | 2,211<br>(556-3,578)            |
| <b>Age at re-LT</b>             | 46<br>(35-54)               | 47<br>(38-56)                | 44<br>(37-56)                | 48<br>(38-57)               | 45<br>(37-53)              | 42<br>(36-54)              | 40<br>(34-48)                 | 44<br>(34-56)               | 47<br>(50-55)                   |
| <b>Male sex</b>                 | 147<br>(75.8)               | 134<br>(75.3)                | 90<br>(70.3)                 | 89<br>(73.6)                | 59<br>(71.1)               | 31<br>(64.6)               | 30<br>(65.2)                  | 28<br>(66.7)                | 47 (74.6)                       |
| <b>Race/ethnicity</b>           |                             |                              |                              |                             |                            |                            |                               |                             |                                 |
| White                           | 171<br>(88.1)               | 140<br>(78.6)                | 105<br>(82.0)                | 105<br>(86.8)               | 62<br>(74.7)               | 41<br>(85.4)               | 33<br>(71.7)                  | 35<br>(83.3)                | 49 (77.8)                       |
| Black                           | 17 (8.8)                    | 28<br>(15.7)                 | 18<br>(14.1)                 | 12 (9.9)                    | 17<br>(20.5)               | 5<br>(10.4)                | 9<br>(19.6)                   | 6<br>(14.3)                 | 10 (15.9)                       |
| Hispanic                        | 3 (1.6)                     | 8 (4.5)                      | 5 (3.9)                      | 2 (1.6)                     | 4 (4.8)                    | 2 (4.2)                    | 4 (8.7)                       | 1 (2.4)                     | 2 (3.2)                         |
| Asian                           | 2 (1.0)                     | 1 (0.6)                      | 0                            | 1 (0.8)                     | 0                          | 0                          | 0                             | 0                           | 2 (3.2)                         |
| Other                           | 1 (0.5)                     | 1 (0.6)                      | 0                            | 1 (0.8)                     | 0                          | 0                          | 0                             | 0                           | 0                               |
| <b>Location</b>                 |                             |                              |                              |                             |                            |                            |                               |                             |                                 |
| In ICU                          | 65<br>(33.5)                | 21<br>(11.8)                 | 70<br>(54.7)                 | 24<br>(19.8)                | 12<br>(14.5)               | 18<br>(37.5)               | 24<br>(52.2)                  | 8<br>(19.0)                 | 13 (20.6)                       |
| Hospitalized                    | 68<br>(35.0)                | 44<br>(24.7)                 | 26<br>(20.3)                 | 42<br>(34.7)                | 27<br>(32.5)               | 18<br>(37.5)               | 12<br>(26.1)                  | 19<br>(45.2)                | 16 (25.4)                       |
| Ambulatory                      | 61<br>(31.4)                | 113<br>(63.5)                | 32<br>(25.0)                 | 55<br>(45.4)                | 44<br>(53.0)               | 12<br>(25.0)               | 10<br>(21.7)                  | 15<br>(35.7)                | 34 (54.0)                       |
| <b>Mechanical ventilation</b>   | 32<br>(16.5)                | 10 (5.6)                     | 52<br>(40.6)                 | 7 (5.8)                     | 7 (8.4)                    | 14<br>(29.2)               | 12<br>(26.1)                  | 6<br>(14.3)                 | 6 (17.0)                        |

|                               |                   |                    |                    |                    |                     |                    |                   |                   |                    |
|-------------------------------|-------------------|--------------------|--------------------|--------------------|---------------------|--------------------|-------------------|-------------------|--------------------|
| <b>MELD score<sup>a</sup></b> | 20<br>(12-27)     | 25<br>(20-34)      | 31<br>(20-36)      | 23<br>(17-30)      | 31<br>(24-36)       | 30<br>(22-36)      | 29<br>(18-36)     | 20<br>(13-29)     | 25<br>(21-33)      |
| <b>Total bilirubin</b>        | 5.4<br>(1.7-13.1) | 13.3<br>(5.4-26.5) | 1.45<br>(7.4-26.5) | 10.4<br>(3.8-26.0) | 24.8<br>(11.5-36.5) | 16.0<br>(8.0-31.4) | 9.1<br>(3.1-26.8) | 4.9<br>(1.8-20.3) | 12.7<br>(4.6-24.5) |
| <b>Creatinine</b>             | 1.1<br>(0.8-1.8)  | 1.4<br>(0.9-2.5)   | 1.6<br>(1.0-3.3)   | 1.3<br>(0.9-1.9)   | 1.6<br>(1.0-2.4)    | 1.3<br>(0.8-2.2)   | 1.3<br>(0.9-2.7)  | 1.0<br>(0.7-1.7)  | 1.3<br>(1.0-2.4)   |
| <b>Albumin</b>                | 2.8<br>(2.3-3.2)  | 2.8<br>(2.3-3.4)   | 3.0<br>(2.3-3.4)   | 2.9<br>(2.5-3.4)   | 2.7<br>(2.4-3.3)    | 2.7<br>(2.4-3.1)   | 2.7<br>(2.3-3.3)  | 2.7<br>(2.2-3.2)  | 2.8<br>(2.3-3.2)   |
| <b>Living donor</b>           | 3 (1.6)           | 4 (2.2)            | 1 (0.8)            | 3 (2.5)            | 0                   | 0                  | 0                 | 2 (4.8)           | 0                  |
| <b>DCD donor</b>              | 1 (0.5)           | 2 (1.1)            | 3 (2.4)            | 0                  | 1 (1.2)             | 2 (4.3)            | 0                 | 0                 | 0                  |
| <b>Donor age<br/>≥60</b>      | 20<br>(10.3)      | 14 (7.9)           | 10 (7.8)           | 11 (9.1)           | 5 (6.0)             | 2 (4.2)            | 4 (8.7)           | 4 (9.5)           | 1 (1.6)            |
| <b>Split graft</b>            | 4 (2.1)           | 4 (2.2)            | 2 (1.6)            | 4 (3.3)            | 0                   | 1 (2.1)            | 0                 | 2 (4.8)           | 10 (15.9)          |

Data are presented as n (%) or median (IQR). Abbreviations: AR, acute rejection; BC, biliary complications; CR, chronic rejection; DCD, donation after cardiac death; INF, infection; IQR, interquartile range; LT, liver transplantation; PSC, primary sclerosing cholangitis; MELD, Model for End-Stage Liver Disease; PNF, primary nonfunction; PSC, primary sclerosing cholangitis; REC, recurrence; VT, vascular thrombosis.

<sup>a</sup> Available for transplants performed after 2/27/2002 (n=442/629).

**Supplemental Table 2. Predictors of Graft Failure and Mortality in Patients with PSC after Primary LT and Re-LT for Disease Recurrence.**

|                               | Graft Failure    |                  | Mortality                     |                  |
|-------------------------------|------------------|------------------|-------------------------------|------------------|
|                               | Univariate       | Multivariate     | Univariate                    | Multivariate     |
|                               | HR (95% CI)      | HR (95% CI)      | HR (95% CI)                   | HR (95% CI)      |
| <b>At 30 Days</b>             |                  |                  |                               |                  |
| Re-LT status                  | 1.32 (0.74-2.36) |                  | 2.04 (1.00-4.18) <sup>a</sup> |                  |
| Contemporary era <sup>b</sup> | 0.67 (0.53-0.85) | 0.64 (0.50-0.83) |                               |                  |
| Age <sup>c</sup>              |                  |                  | 1.14 (1.06-1.23)              | 1.14 (1.06-1.29) |
| In ICU                        | 2.15 (1.54-3.01) | 1.98 (1.37-2.87) | 3.97 (2.62-6.03)              | 2.68 (1.67-4.28) |
| Mechanical ventilation        | 2.63 (1.54-4.51) |                  | 5.37 (2.96-9.75)              |                  |
| Total bilirubin               | 1.01 (1.00-1.02) | 1.01 (1.00-1.02) | 1.03 (1.02-1.05)              | 1.02 (1.01-1.04) |
| Creatinine                    | 1.14 (1.03-1.25) |                  | 1.31 (1.19-1.45)              |                  |
| Split graft                   | 1.42 (1.03-1.96) | 1.74 (1.25-2.42) |                               |                  |
| <b>At Five Years</b>          |                  |                  |                               |                  |
| Re-LT status                  | 1.13 (0.82-1.55) |                  | 1.38 (0.95-2.00)              |                  |
| Contemporary era <sup>b</sup> | 0.79 (0.70-0.89) | 0.72 (0.63-0.81) |                               |                  |
| Age <sup>c</sup>              |                  |                  | 1.12 (1.08-1.15)              | 1.11 (1.07-1.14) |
| In ICU                        | 1.69 (1.40-2.04) | 1.45 (1.18-1.78) | 2.20 (1.77-2.74)              |                  |
| Mechanical ventilation        | 1.73 (1.24-2.41) |                  | 2.41 (1.67-3.48)              | 1.76 (1.20-2.58) |
| Total bilirubin               | 1.01 (1.01-1.02) | 1.01 (1.01-1.02) | 1.02 (1.01-1.02)              | 1.02 (1.01-1.02) |
| Creatinine                    | 1.12 (1.07-1.18) |                  | 1.21 (1.14-1.27)              | 1.09 (1.02-1.17) |
| Albumin                       |                  |                  | 0.82 (0.74-0.92)              | 0.88 (0.78-0.98) |
| Living donor                  |                  |                  | 0.67 (0.50-0.90)              |                  |
| DCD donor                     | 1.57 (1.13-2.16) | 1.88 (1.36-2.62) |                               |                  |
| Donor age ≥60                 | 1.46 (1.25-1.71) | 1.50 (1.27-1.76) | 1.44 (1.17-1.77)              | 1.30 (1.05-1.60) |
| Primary liver malignancy      | 1.52 (1.07-2.16) | 1.88 (1.32-2.69) | 2.41 (1.67-3.48)              | 3.09 (2.13-4.49) |
| UNOS region                   |                  |                  |                               |                  |

|    | Reference        | Reference        | Reference        | Reference        |
|----|------------------|------------------|------------------|------------------|
| 1  |                  |                  |                  |                  |
| 2  | 0.96 (0.68-1.34) | 0.91 (0.64-1.29) | 0.96 (0.62-1.49) | 0.95 (0.60-1.51) |
| 3  | 0.88 (0.63-1.21) | 0.83 (0.59-1.16) | 0.88 (0.58-1.35) | 0.86 (0.55-1.34) |
| 4  | 1.04 (0.73-1.49) | 1.05 (0.73-1.51) | 1.21 (0.77-1.90) | 1.31 (0.82-2.08) |
| 5  | 0.90 (0.65-1.26) | 0.83 (0.59-1.18) | 1.05 (0.68-1.60) | 1.00 (0.65-1.56) |
| 6  | 0.77 (0.50-1.19) | 0.75 (0.48-1.17) | 0.88 (0.51-1.52) | 0.86 (0.49-1.50) |
| 7  | 0.73 (0.52-1.02) | 0.68 (0.48-0.96) | 0.69 (0.44-1.07) | 0.66 (0.42-1.05) |
| 8  | 0.80 (0.57-1.13) | 0.80 (0.56-1.14) | 0.70 (0.44-1.10) | 0.73 (0.46-1.16) |
| 9  | 1.03 (0.72-1.48) | 0.98 (0.67-1.43) | 1.09 (0.68-1.74) | 1.08 (0.67-1.76) |
| 10 | 0.79 (0.56-1.10) | 0.81 (0.57-1.14) | 0.86 (0.56-1.33) | 0.93 (0.60-1.45) |
| 11 | 1.07 (0.77-1.50) | 1.12 (0.79-1.59) | 1.17 (0.76-1.80) | 1.32 (0.85-2.06) |

Cohort included all primary LTs (n=5,080) and re-LTs for disease recurrence (n=178). Only covariates significant ( $p < 0.05$ ) in univariate analyses and included in multivariate models are shown. Non-significant covariates included: sex, race/ethnicity, and IBD diagnosis. Re-LT status was considered for inclusion in each multivariate model. Abbreviations: CI, confidence interval; DCD, donation after cardiac death; HR, hazard ratio; IBD, inflammatory bowel disease; ICU, intensive care unit; PSC, primary sclerosing cholangitis; re-LT, liver retransplantation; UNOS, United Network for Organ Sharing.

<sup>a</sup>  $p = 0.051$

<sup>b</sup> Transplants performed from 2005-2015 vs. 1987-2004.

<sup>c</sup> Per five-year increase.

**Supplemental Table 3. Risk Factors for Graft Failure and Mortality after Re-LT for Disease Recurrence in Patients with PSC.**

|                        | Graft Failure     |                   | Mortality          |                    |
|------------------------|-------------------|-------------------|--------------------|--------------------|
|                        | Univariate        | Multivariate      | Univariate         | Multivariate       |
|                        | HR (95% CI)       | HR (95% CI)       | HR (95% CI)        | HR (95% CI)        |
| <b>At 30 Days</b>      |                   |                   |                    |                    |
| Mechanical ventilation | 6.29 (1.70-23.26) | 6.29 (1.70-23.26) | 11.54 (2.75-48.36) | 11.54 (2.75-48.36) |
| <b>At Five Years</b>   |                   |                   |                    |                    |
| Mechanical ventilation | 3.94 (1.65-9.40)  | 2.97 (1.18-7.48)  | 4.76 (1.81-12.50)  | 2.90 (1.03-8.17)   |
| Total bilirubin        | 1.03 (1.01-1.05)  | 1.02 (1.00-1.04)  | 1.04 (1.02-1.06)   | 1.04 (1.02-1.06)   |
| Creatinine             | 1.28 (1.05-1.55)  | 1.26 (1.01-1.57)  | 1.32 (1.06-1.65)   |                    |
| Living donor           | 4.86 (1.49-15.84) | 8.95 (2.60-30.82) | 4.55 (1.08-19.22)  | 7.64 (1.74-33.50)  |
| Donor age ≥60          | 3.60 (1.66-7.82)  | 3.81 (1.72-8.41)  | 4.68 (2.00-10.99)  | 4.80 (2.00-11.50)  |

Only covariates significant ( $p < 0.05$ ) in univariate analyses and included in multivariate models are shown. Non-significant covariates included: age, sex, race/ethnicity, IBD diagnosis, UNOS region, primary liver malignancy, time to re-LT, time period of re-LT, ICU status, albumin, DCD donor, and other etiologies of graft failure. All split/partial grafts in this cohort were living donor transplantations, so only living donor was included. Abbreviations: CI, confidence interval; DCD, donation after cardiac death; HR, hazard ratio; IBD, inflammatory bowel disease; PSC, primary sclerosing cholangitis; re-LT, liver retransplantation; UNOS, United Network for Organ Sharing.
